# Supplementary material for: Expression, purification and initial characterization of human serum albumin domain I and its cysteine 34
Source: PubMed Central journal article supplement (PMC7549792; doi:10.1371/journal.pone.0240580), 2020-10-12
Supplement: pone.0240580.s001.pdf [file pone.0240580.s001.pdf]

Images were obtained using a Canon scanner

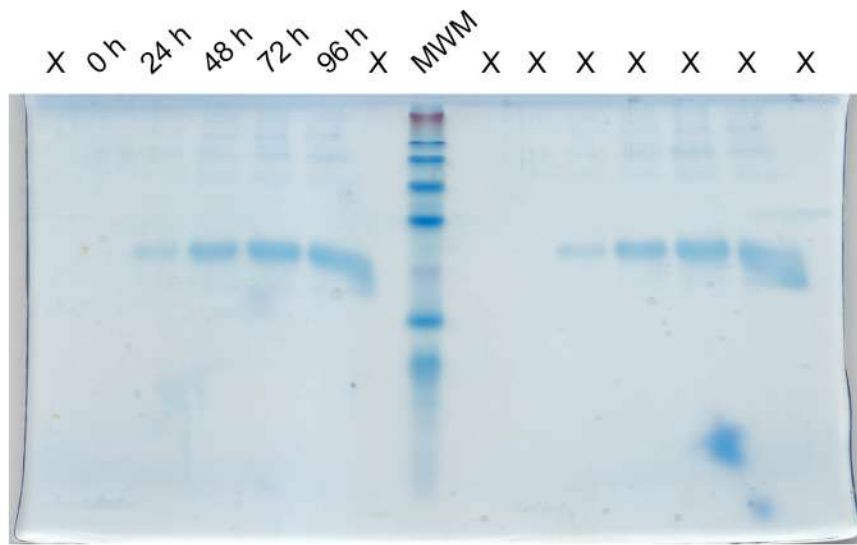

Fig 1 panel A

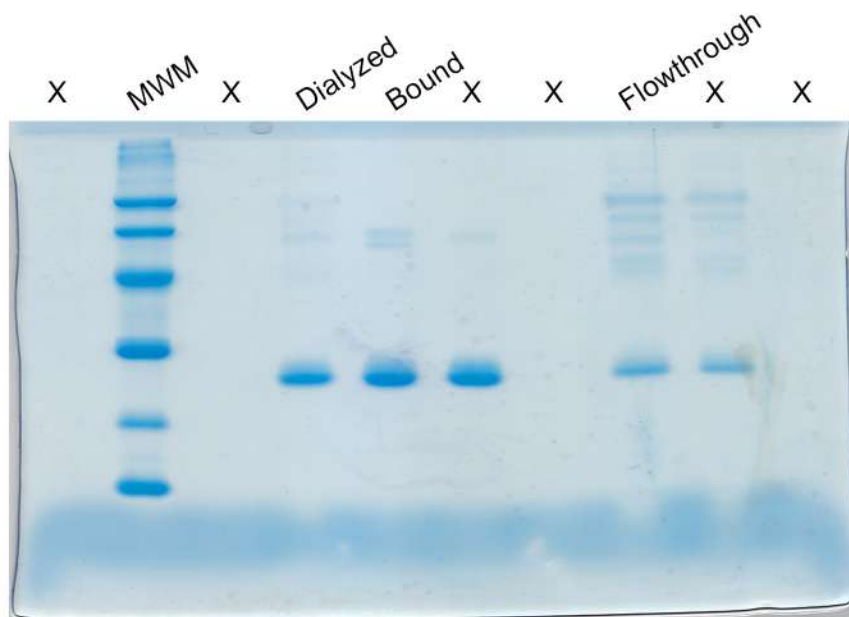

Fig 2 panel B
